# Supplementary material for: Synthesis, Characterization, Crystal Structure and Antimicrobial Activity of Copper(II) Complexes with the Schiff Base Derived from 2-Hydroxy-4-Methoxybenzaldehyde
Source: PubMed Central journal article supplement (PMC6272500; doi:10.3390/molecules20045771), 2015-04-02
Supplement: molecules-20-05771-s001.pdf [file molecules-20-05771-s001.pdf]

# Supplementary Materials

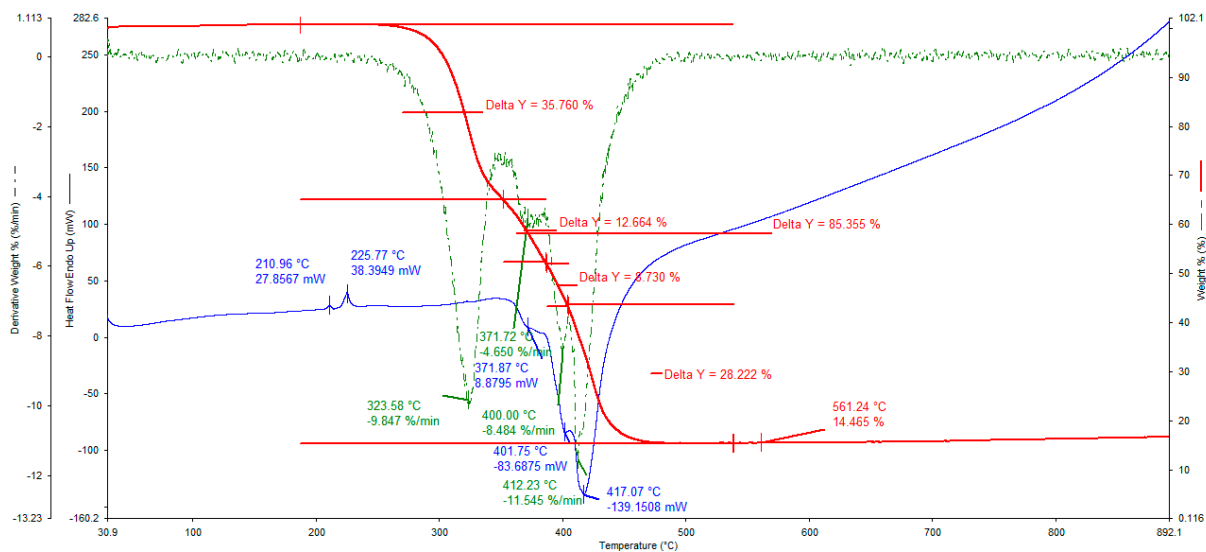

(a)

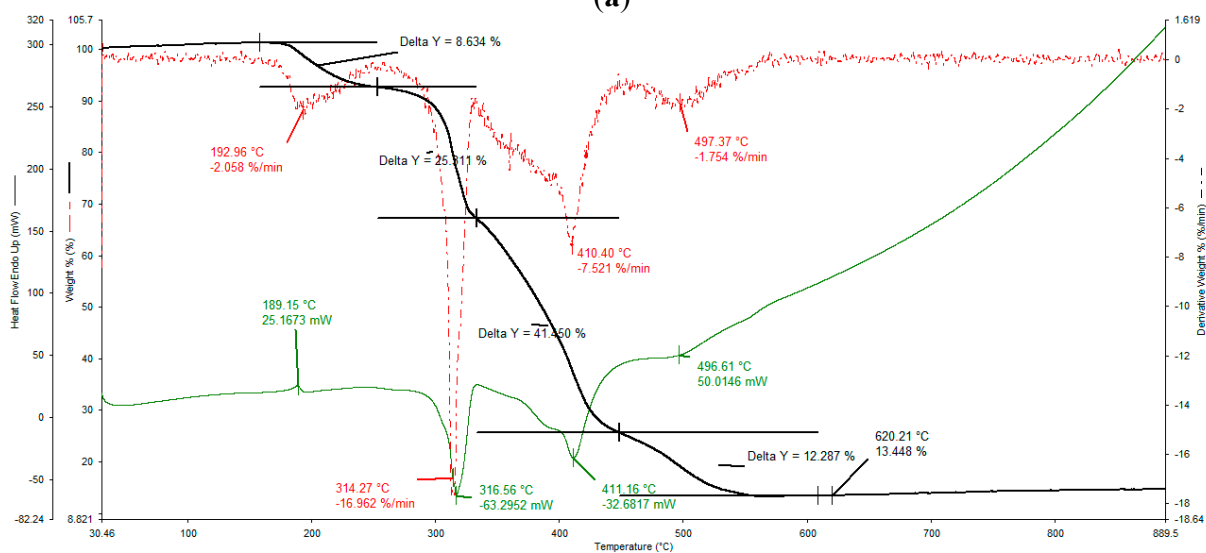

(b)

**Figure S1.** Thermogravimetric analysis complexes of (a) 2, and (b) 4.

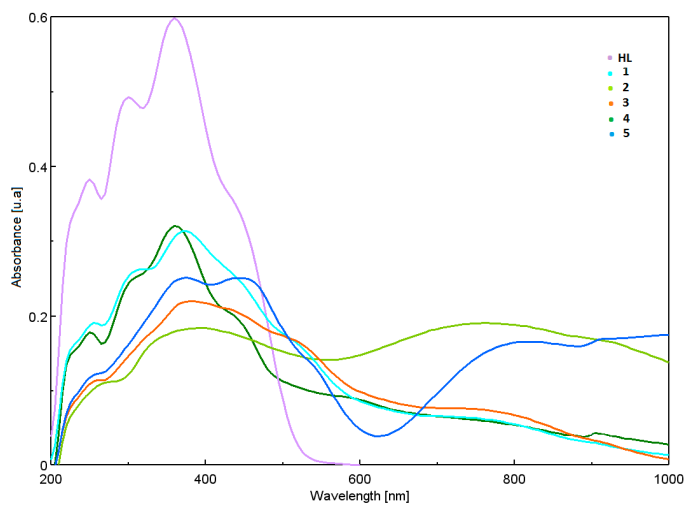

**Figure S2.** Electronic spectra of complexes 1–5.

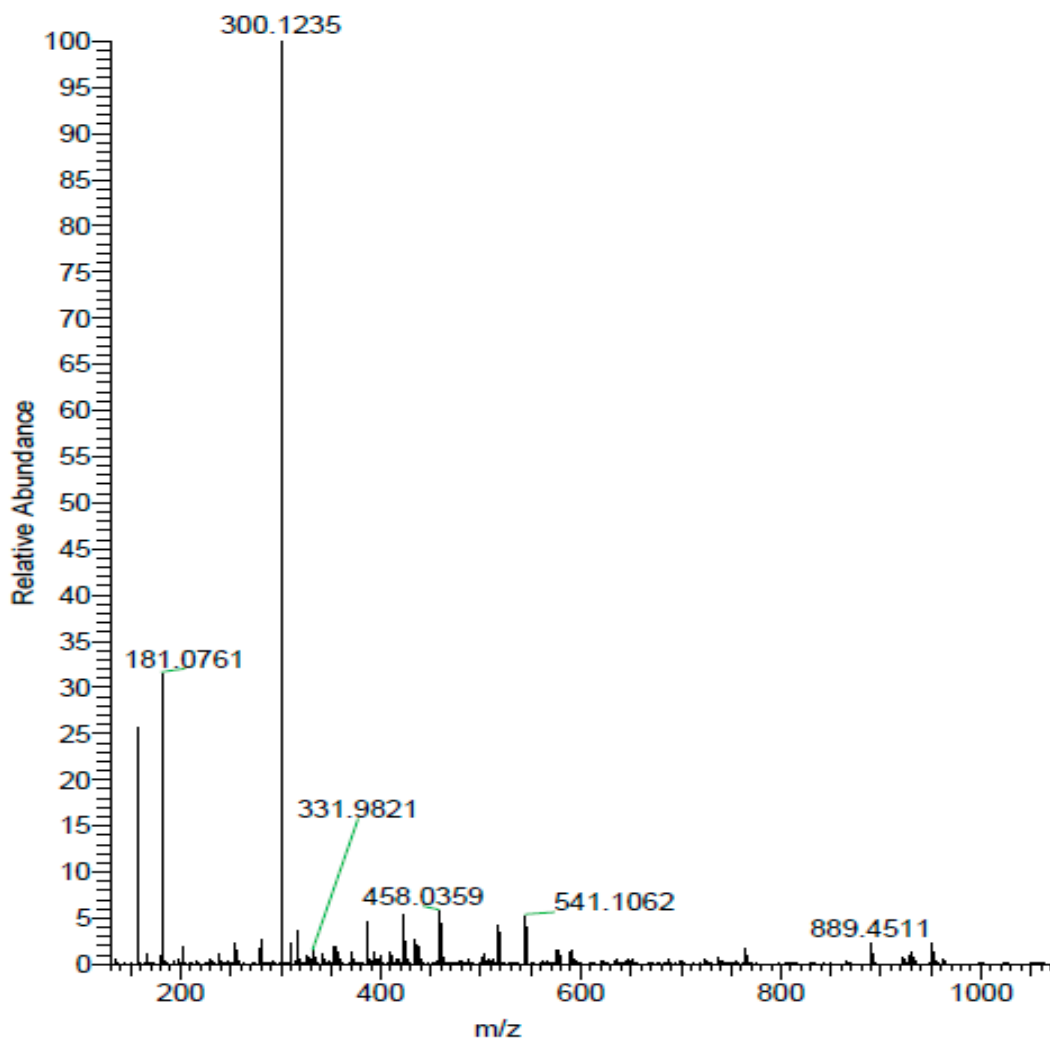

**Figure S3.** Mass spectra of Schiff base (HL).

**Table S1.** FAB mass spectral data of complexes 1–5.

| Molecular Formula                                                                       | Mw (g/mol) | Molecular Ion Peak [M] <sup>+</sup> | The Peaks due to Complex Fragmentation |       |       |       |
|-----------------------------------------------------------------------------------------|------------|-------------------------------------|----------------------------------------|-------|-------|-------|
| [Cu(L)(NO <sub>3</sub> )(H <sub>2</sub> O) <sub>2</sub> ] (1)                           | 459.5      | 386.9                               | 253.9                                  | 308.9 | 331.9 | 343.1 |
| [Cu(L) <sub>2</sub> ] (2)                                                               | 659.5      | 658.0                               | 308.9                                  | 355.9 | 506.5 | 576.0 |
| [Cu(L)(OAc)] (3)                                                                        | 420.5      | 399.1                               | 300.1                                  | 334.2 | 366.2 | 383.2 |
| [Cu <sub>2</sub> (L) <sub>2</sub> Cl <sub>2</sub> (H <sub>2</sub> O) <sub>4</sub> ] (4) | 866        | 759.0                               | 300.1                                  | 331.9 | 461.6 | 544.8 |
| [Cu(L)(ClO <sub>4</sub> )(H <sub>2</sub> O)] (5)                                        | 479        | 361.0                               | 257.9                                  | 286.1 | 317.9 | 343.1 |
